# Supplementary material for: CHIP phosphorylation by protein kinase G enhances protein quality control and attenuates cardiac ischemic injury
Source: PubMed Central journal article supplement (PMC7575552; doi:10.1038/s41467-020-18980-x), 2020-10-20
Supplement: 41467_2020_18980_MOESM1_ESM.pdf [file 41467_2020_18980_MOESM1_ESM.pdf]

## **Supplementary Figures and Table**

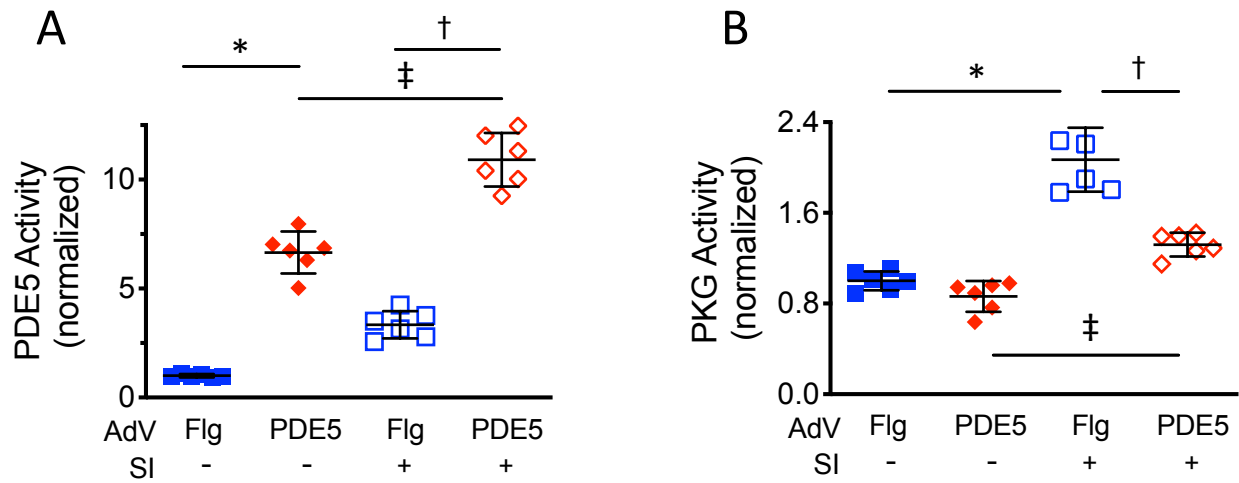

**Supplementary Figure 1.**

**PDE5A overexpression blocks PKG activation with simulated ischemia (SI).**

**A)** Myocytes are infected with adenovirus expressing Flag or Flag-PDE5A and then subjected to normal conditions or 48 hours of simulated ischemia. PDE5A activity is increased by overexpression in both conditions but is higher after SI. N=6 biological replicates/group, 2WANOVA, Tukey multiple comparisons test (mct): \*  $p=1.3 \cdot 10^{-9}$ , †  $7 \cdot 10^{-12}$  ‡  $1.6 \cdot 10^{-7}$ . **B)** This is accompanied by suppression of PKG activation particularly after SI. N=6 biological replicates/group; 2WANOVA, Tukey mct: \*  $p=4.4 \cdot 10^{-9}$ , †  $1.3 \cdot 10^{-6}$  ‡  $8.4 \cdot 10^{-4}$ . Data are mean  $\pm$  SD for both panels.

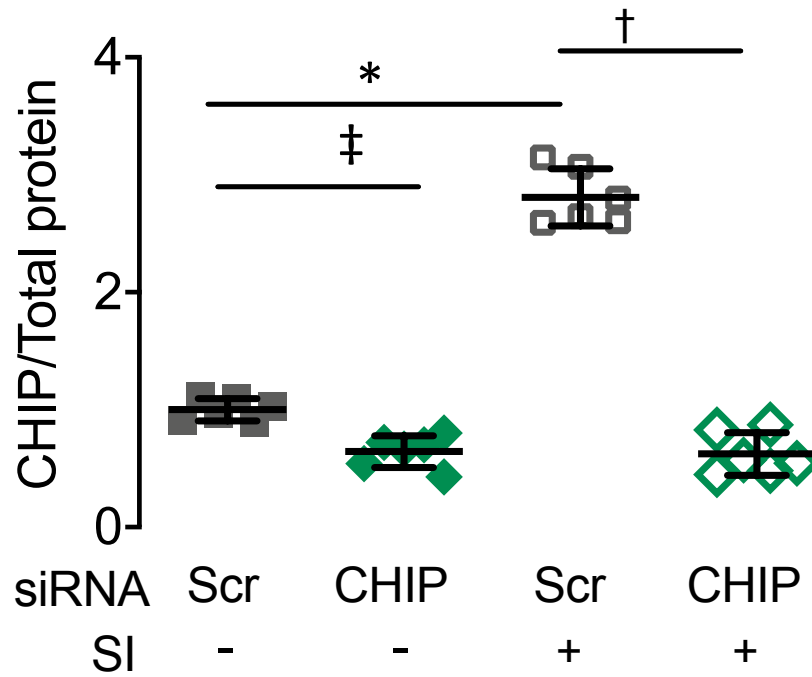

**Supplementary Figure 2.**

**Summary data for efficacy of CHIP siRNA in isolated cardiomyocytes.**

Quantitation of immunoblots (Figure 1E) showing efficacy of siRNA to reduce CHIP protein levels in cardiomyocytes in vitro. N=6 biological replicates, 2WANOVA, Tukey

mct: \*  $p=10^{-12}$ , †  $<10^{-12} \pm 0.01$ . Mean  $\pm$  SD.

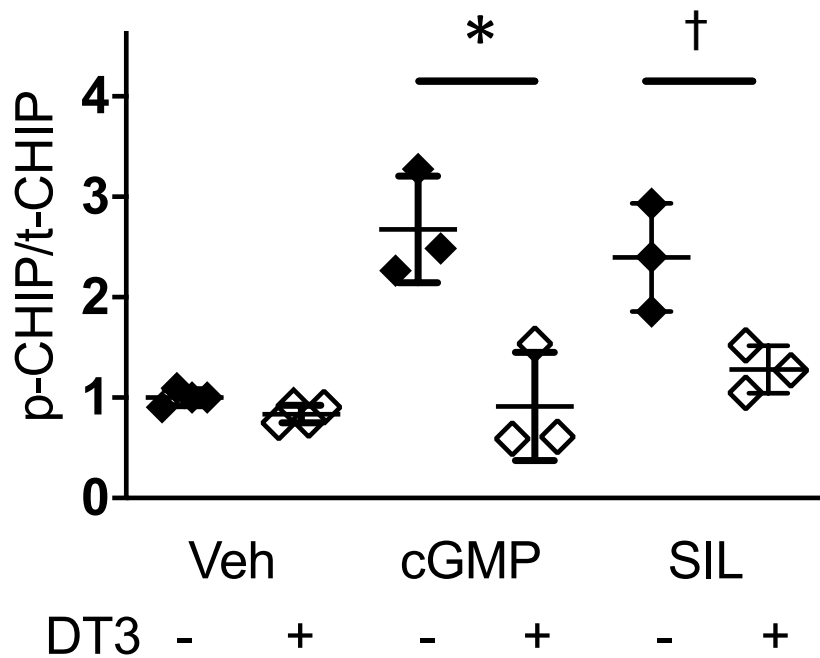

**Supplementary Figure 3.**

**PKG activation is required for cGMP and PDE5 inhibition to phosphorylate CHIP.**

Quantitation of immunoblots as displayed in Figure 2F. Data are ratio of phospho (pS20)/total (p-CHIP/t-CHIP) normalized to values for Vehicle control without PKG inhibitor DT3. The ratio increases with either cGMP stimulation or inhibiting of PDE5, and this is reversed by co-incubation with PKG inhibitor DT3. 3-4 biological replicates per condition. 2WANOVA,  $P=0.00025$  for DT3 effect; Sidak's mct: \*  $p=0.029$ ; †  $0.001$ . Mean  $\pm$  SD.

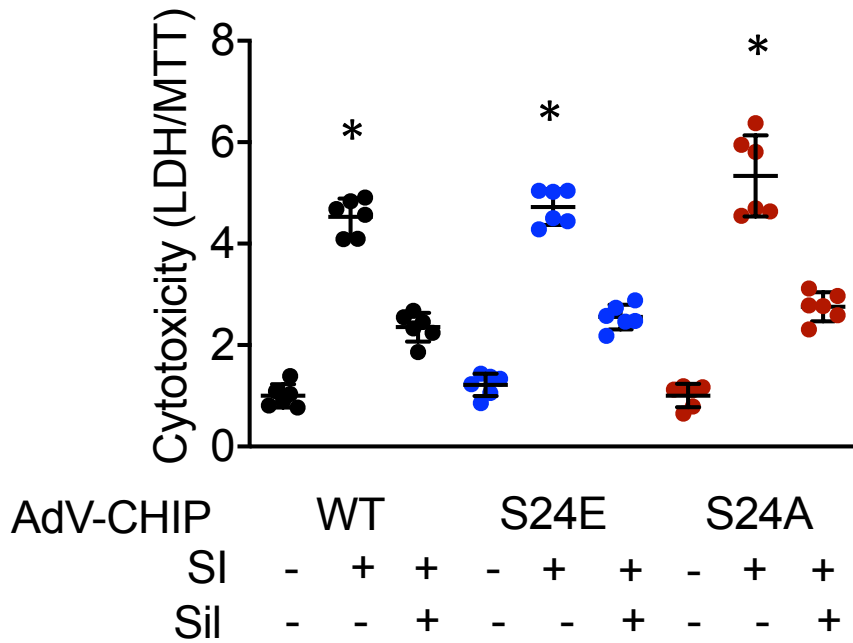

**Supplementary Figure 4.**

**Minimal effect from mutating CHIP S24 on myocyte response to simulated ischemia (SI).**

Mutating CHIP S24 to a phosphomimetic (S24E) or null (S24A) has minimal impact on cytotoxic response to SI or benefit from PKG activation using PDE5 inhibitor sildenafil (SIL). N=6 biological replicates/group; 1WANOVA within each CHIP genotype group, Sidak's mct: \*  $p < 10^{-11}$  versus other two conditions in each respective group. Mean  $\pm$  SD.

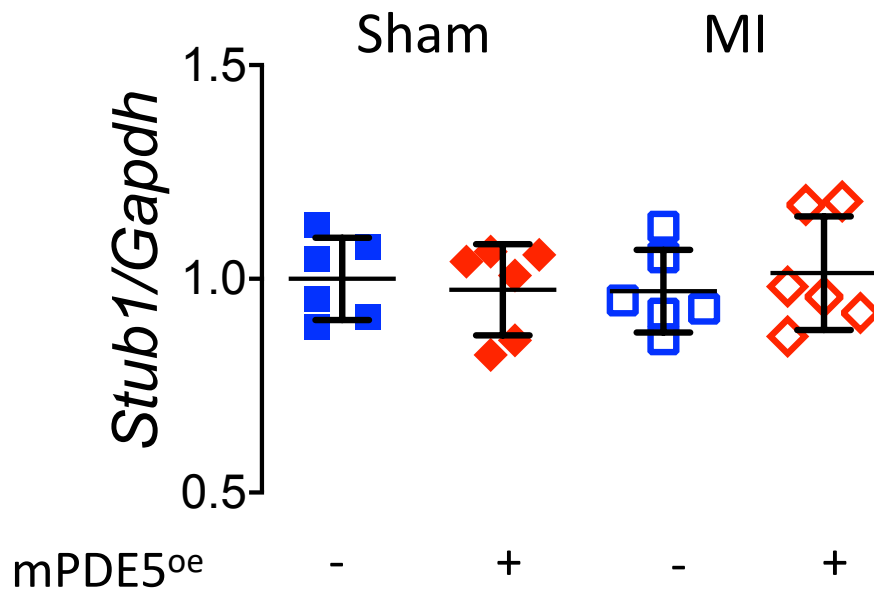

**Supplementary Figure 5.**

**CHIP gene expression (*Stub1*) normalized to GAPDH is unaltered in both control and mPDE5<sup>oe</sup> mice with and without myocardial infarction.**

Myocardial mRNA expression for CHIP (*Stub1/Gapdh*) in mice with myocyte specific PDE5A overexpression (mPDE5<sup>oe</sup>) or littermate controls with sham surgery or myocardial infarction (MI). There is no change in gene expression in these conditions. N=6 mice for each group, 1WANOVA, p=0.89. Mean  $\pm$  SD.

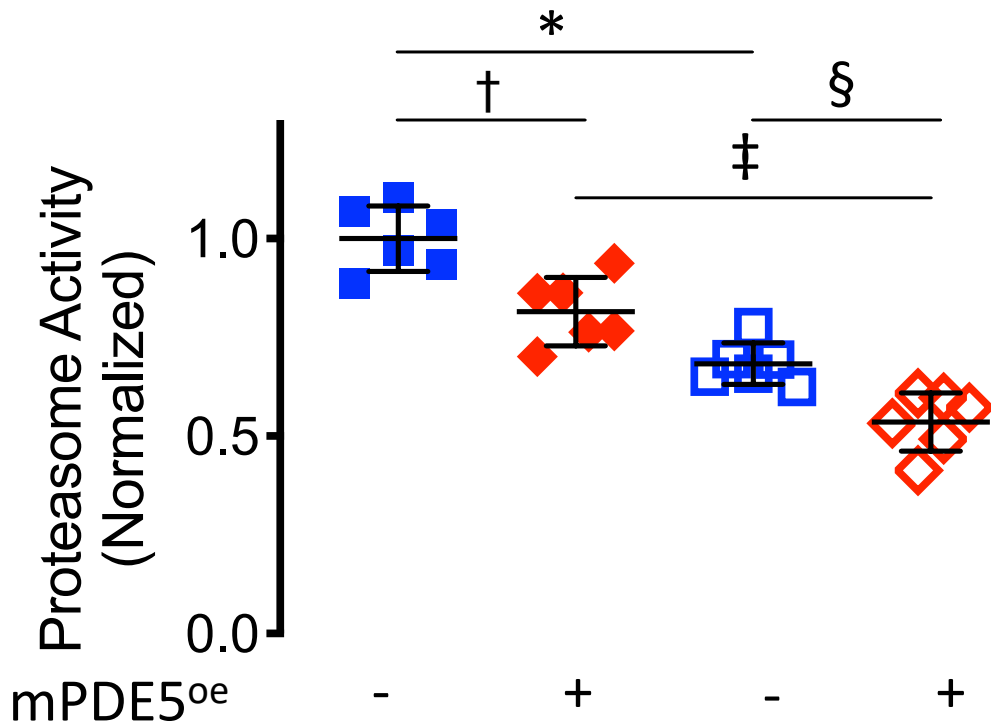

**Supplementary Figure 6.**

**Proteasome activity in myocardium of sham or MI mice +/- mPDE5<sup>oe</sup>.**

Proteasome activity in peri-infarct region from WT and mPDE5A<sup>oe</sup> hearts in normal and post-MI conditions. PDE5A overexpression reduced proteasome activity similarly in mice with or without the infarct. N=6 biological replicates; 2WANOVA, no interaction (p=0.55); \*  $2 \cdot 10^{-6}$ , † 0.001; ‡  $10^{-5}$ , § 0.006. Mean  $\pm$  SD.

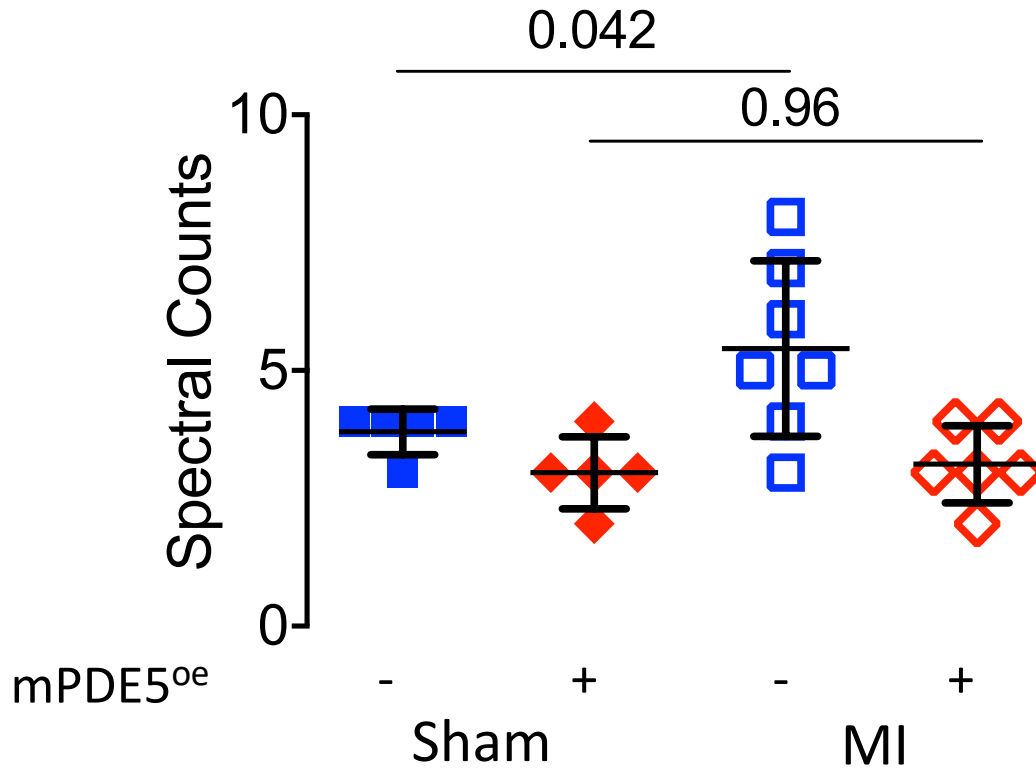

**Supplementary Figure 7.**

**Mass spectroscopic detection of phospho-serine 20 on CHIP protein.**

Myocardial extracts for sham and MI from the anterior wall (peri-infarct for MI group) in mPDE5A<sup>oe</sup> and littermate control mice. n=5-6 different animals/group; 2WANOVA, effect of mPDE5<sup>oe</sup> =0.005; Sidak's mct: p values in figure. Mean ± SD.



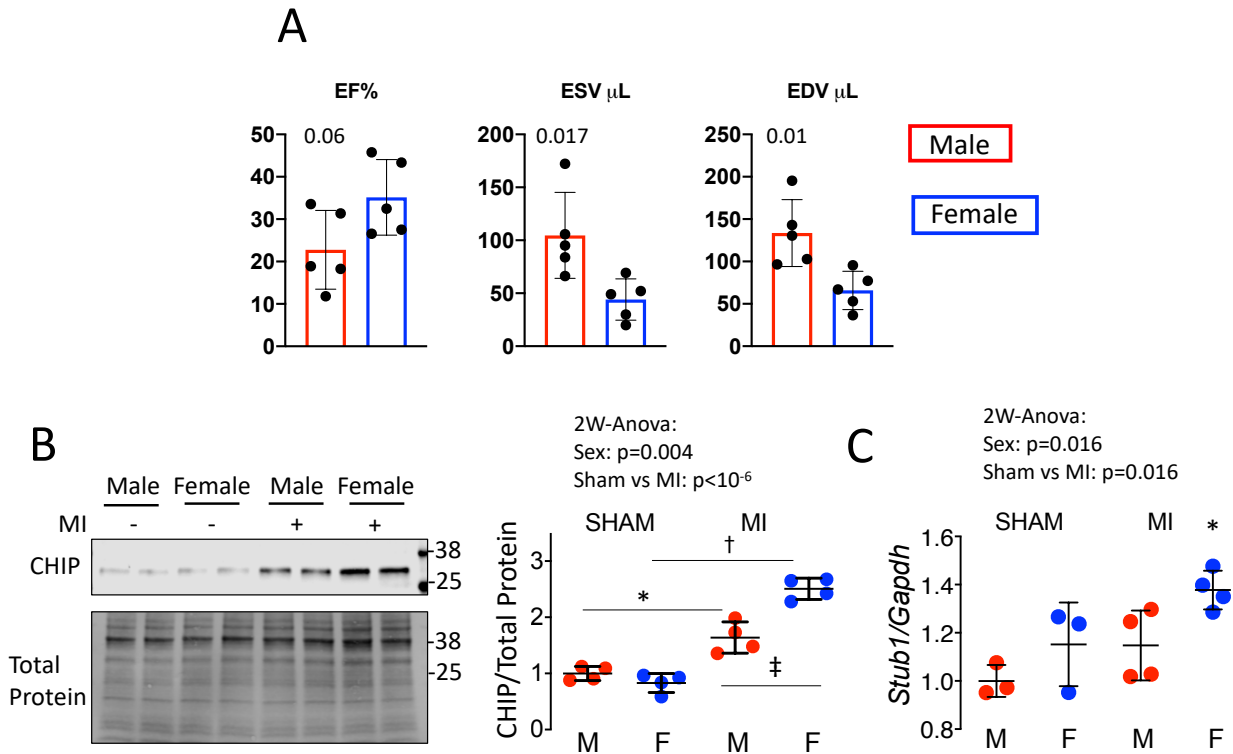

**Supplementary Figure 8. Sex disparities in cardiac functional parameters and in CHIP (gene and protein) levels following MI.**

**A)** Female mice subjected to MI display significantly less myocardial dysfunction and chamber dilation as compared to males.  $N=5$  different mice per group. P-values shown in each plot are for unpaired t-test between groups. **B)** Example immunoblot for CHIP expression (left) and summary data (right) determined in female versus male myocardium with or without MI. Protein levels were greater in females than males after MI.  $N=4$  biological replicates per group. 2WANOVA (interaction of sex and condition:  $2 \cdot 10^{-4}$ , Tukey mct: \*  $p=0.003$ ; †  $2.6 \cdot 10^{-7}$ , ‡  $2.3 \cdot 10^{-4}$ ). **C)** CHIP gene expression (*Stub1/Gapdh*) in males versus females.  $N=3-4$  mice in each group. 2WANOVA (sex effect  $p=0.016$ ), Sidak's mct: \*  $p=0.048$ . All panels data are Mean  $\pm$  SD.

**Supplementary Table 1.** Resting cardiac function and left ventricular mass from 9-12 months old CHIP<sup>S20E/S20E</sup> mice and littermate WT controls (n=5-7/group). The KI mice show normal heart function and morphometry (p values for 2-tailed T-test). Data are mean  $\pm$  SD.

|                                     | Mice Aged 9-12 Months |   |                  |   | p-value |
|-------------------------------------|-----------------------|---|------------------|---|---------|
|                                     | Chip WT               | n | Chip SE          | n |         |
| Body Weight (g)                     | 29.8 $\pm$ 2.3        | 6 | 27.7 $\pm$ 2.5   | 7 | 0.14    |
| Heart Weight (mg)                   | 164.3 $\pm$ 14.9      | 6 | 147.0 $\pm$ 19.1 | 7 | 0.10    |
| Left Ventricular Weight (mg)        | 119.9 $\pm$ 9.1       | 6 | 108.1 $\pm$ 13.6 | 7 | 0.10    |
| Lung Weight (mg)                    | 145.9 $\pm$ 17.1      | 6 | 131.8 $\pm$ 12.9 | 7 | 0.12    |
| Heart/Body Weight (mg/g)            | 5.5 $\pm$ 0.3         | 6 | 5.3 $\pm$ 0.3    | 7 | 0.15    |
| Left Ventricular/Body Weight (mg/g) | 4.0 $\pm$ 0.2         | 6 | 3.9 $\pm$ 0.2    | 7 | 0.27    |
| Lung/Body Weight (mg/g)             | 4.9 $\pm$ 0.4         | 6 | 4.8 $\pm$ 0.2    | 7 | 0.47    |
| Heart Rate (bpm)                    | 701.7 $\pm$ 24.7      | 5 | 733.1 $\pm$ 59.6 | 5 | 0.31    |
| Ejection Fraction (%)               | 66.9 $\pm$ 3.6        | 5 | 67.0 $\pm$ 2.1   | 5 | 0.95    |
